# Supplementary material
Source: MDPI journal article supplement (https://www.mdpi.com/2227-9040/10/11/445)
Supplement: s1 [file s1]

# Enhanced Electromagnetic Coupling in the Walnut-Shaped Nanostructure Array

Deyuan Mao <sup>1</sup>, Xiaoyu Zhao <sup>1</sup>, Jiahong Wen <sup>2,3,\*</sup>, Aofang Wang <sup>4</sup>, Renxian Gao <sup>5</sup> and Yaxin Wang <sup>1,\*</sup>

<sup>1</sup> School of Material and Environmental Engineering, Hangzhou Dianzi University, Hangzhou 310018, China

<sup>2</sup> The College of Electronics and Information, Hangzhou Dianzi University, Hangzhou 310018, China

<sup>3</sup> Shangyu Institute of Science and Engineering, Shaoxing 312000, China

<sup>4</sup> Hangzhou Dianzi University, Hangzhou 310018, China

<sup>5</sup> College of Physical Science and Technology, Xiamen University, Xiamen 361005, China

\* Correspondence: wenjiahong@hdu.edu.cn (J.W.); yaxinwang@hdu.edu.cn (Y.W.)

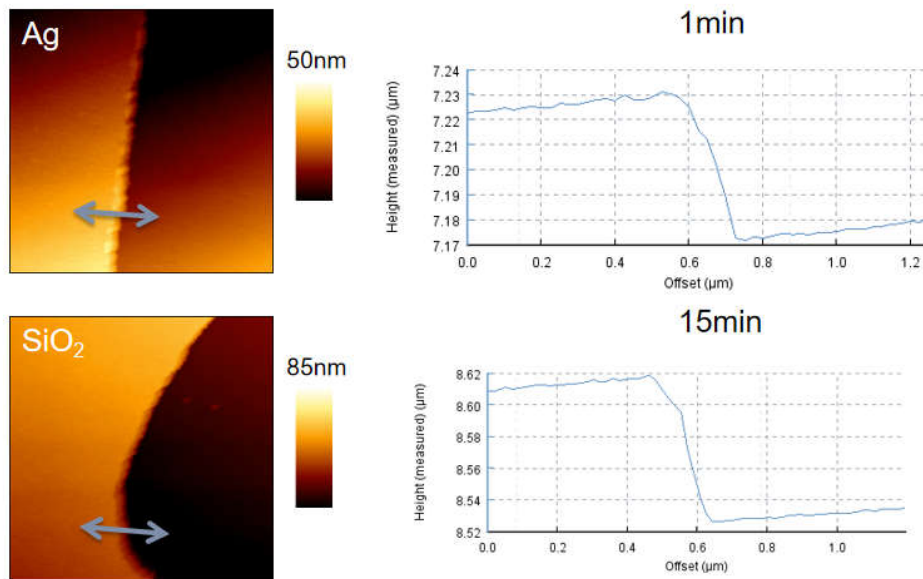

Figure S1. AFM of the Ag film and SiO<sub>2</sub> film.

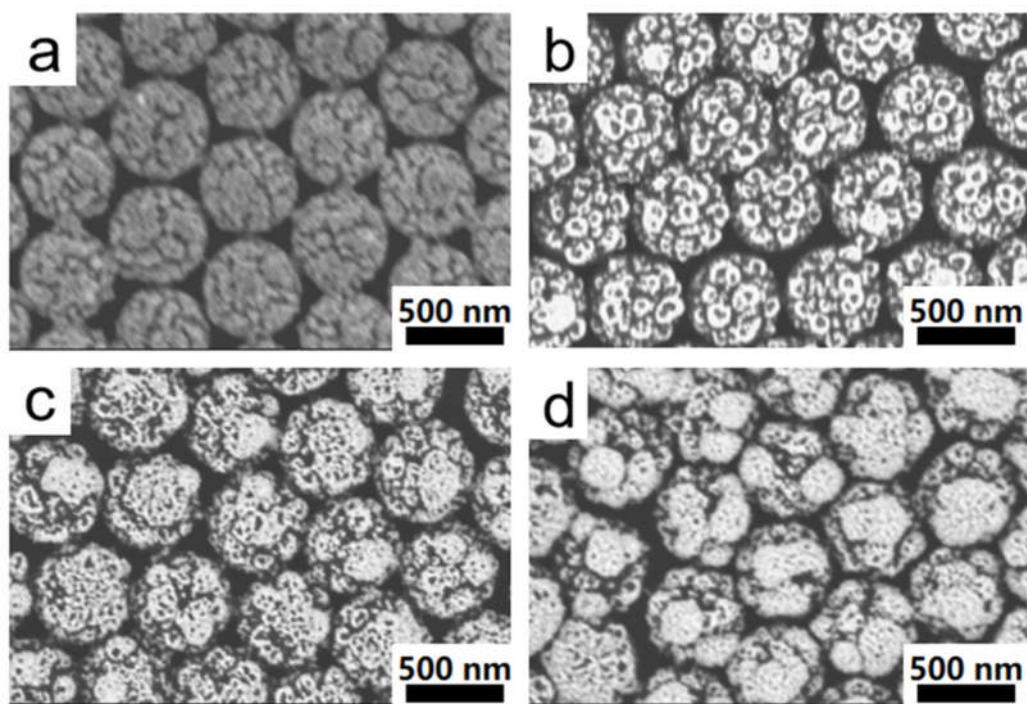

**Figure S2.** SEM of the nanostructure with the Ag-SiO<sub>2</sub> nanoparticle film (20nm) after etching for (a) 0 s, (b) 30 s, (c) 60 s, (d) 90 s.

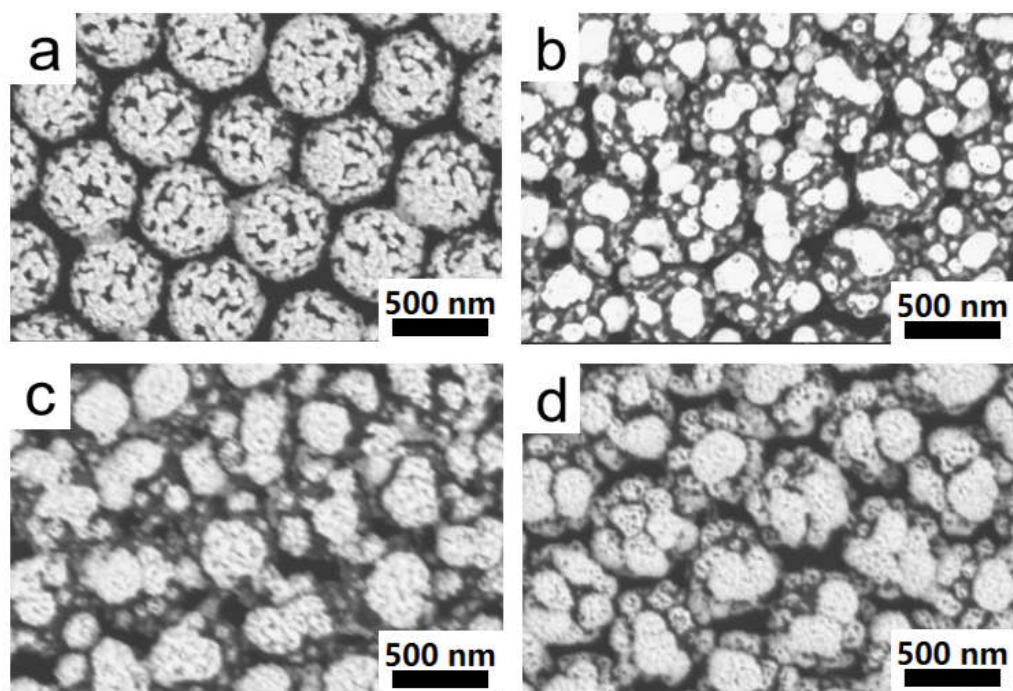

**Figure S3.** SEM of the nanostructure with the Ag-SiO<sub>2</sub> nanoparticle film (30nm) after etching for (a) 0 s, (b) 30 s, (c) 60 s, (d) 90 s.

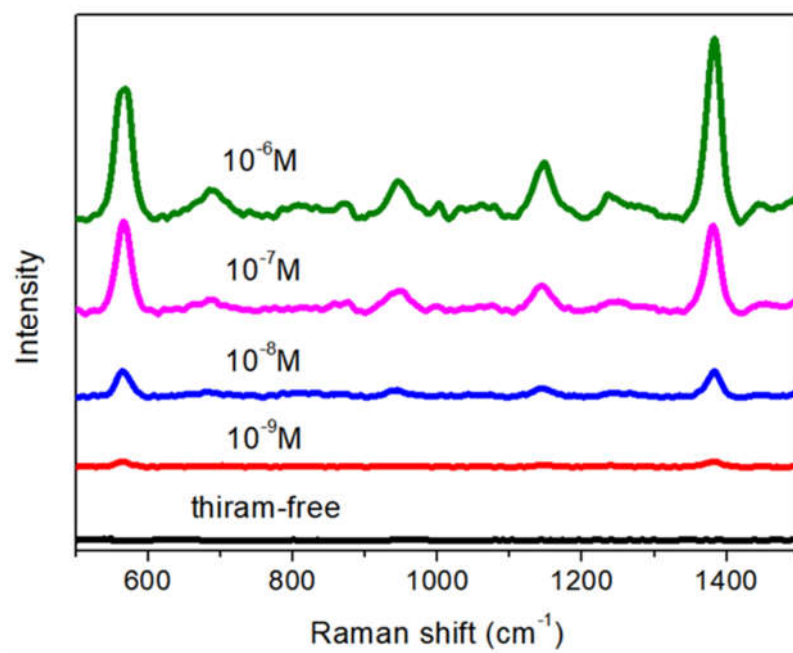

**Figure S4.** SERS spectra for thiram detection with different concentrations and thiram-free solution.
